# Supplementary material for: Thermodynamic properties of LiNiO2, LiCoO2, and LiMnO2 using density-functional theory
Source: Royal Society of Chemistry journal article supplement (doi:10.1039/d3cp01771k), 2023-01-01
Supplement: d3cp01771k1.pdf [file d3cp01771k1.pdf]

## Crystallography information of species with deviation from the experimental information

Mn<sub>2</sub>O<sub>3</sub>

Space group  $P2_12_12_1$

| Site | Elements (spin direction) | Wyckoff position | x         | y         | z        |
|------|---------------------------|------------------|-----------|-----------|----------|
| Mn1  | Mn (↑)                    | 4a               | 0.498767  | 0         | 0.501022 |
| Mn2  | Mn (↓)                    | 4a               | 0.287938  | 0         | 0.758195 |
| Mn3  | Mn (↑)                    | 4a               | 0.785937  | 0         | 0.74197  |
| Mn4  | Mn (↑)                    | 4a               | 0.0206346 | 0.239975  | 0.718515 |
| Mn5  | Mn (↓)                    | 4a               | 0.515974  | 0.246036  | 0.783362 |
| Mn6  | Mn (↓)                    | 4a               | 0         | 0.499637  | 1        |
| Mn7  | Mn (↑)                    | 4a               | 0.258841  | 0.216495  | 0.507748 |
| Mn8  | Mn (↓)                    | 4a               | 0.761263  | 0.216498  | 0.988547 |
| O1   | O                         | 4a               | 0.155252  | 0.0859903 | 0.637821 |
| O2   | O                         | 4a               | 0.3816    | 0.149303  | 0.923135 |
| O3   | O                         | 4a               | 0.0815644 | 0.12388   | 0.360589 |
| O4   | O                         | 4a               | 0.0815278 | 0.376423  | 0.858566 |
| O5   | O                         | 4a               | 0.140618  | 0.348115  | 0.59384  |
| O6   | O                         | 4a               | 0.354362  | 0.421068  | 0.880887 |
| O7   | O                         | 4a               | 0.137604  | 0.149238  | 0.092168 |
| O8   | O                         | 4a               | 0.426502  | 0.124852  | 0.651339 |
| O9   | O                         | 4a               | 0.352105  | 0.0776471 | 0.382721 |
| O10  | O                         | 4a               | 0.655864  | 0.09096   | 0.860356 |
| O11  | O                         | 4a               | 0.927092  | 0.120804  | 0.851625 |
| O12  | O                         | 4a               | 0.878631  | 0.149225  | 0.5798   |

| a      | b      | c        | $\alpha$ | $\beta$ | $\gamma$ |
|--------|--------|----------|----------|---------|----------|
| 9.4773 | 9.5148 | 9.430859 | 90       | 90      | 90       |

Table S1 – Crystallography information of Mn<sub>2</sub>O<sub>3</sub> employed in our calculations.

r-LiMnO<sub>2</sub>  
 Space group  $P2_1/c$

| Site | Elements (spin direction) | Wyckoff position | x       | y       | z       |
|------|---------------------------|------------------|---------|---------|---------|
| Li   | Li                        | 2e               | 0       | 0.25    | 0.37441 |
| Li   | Li                        | 2e               | 0       | 0.25    | 0.03479 |
| Mn   | Mn ( $\uparrow$ )         | 2f               | 0.5     | 0.25    | 0.86969 |
| Mn   | Mn ( $\downarrow$ )       | 2f               | 0.5     | 0.25    | 0.36969 |
| O    | O                         | 4g               | 0.26641 | 0.25976 | 0.12145 |
| O    | O                         | 4g               | 0.26641 | 0.25976 | 0.62144 |

  

| a        | b        | c        | $\alpha$ | $\beta$ | $\gamma$ |
|----------|----------|----------|----------|---------|----------|
| 5.695706 | 5.410593 | 5.541325 | 90       | 90      | 90       |

Table S2 - Crystallography information of rhombohedral LiMnO<sub>2</sub> employed in our calculations.

LiNiO<sub>2</sub>  
 Space group  $P2_1/c$

| Site | Elements | Wyckoff position | x        | y        | z        |
|------|----------|------------------|----------|----------|----------|
| Li   | Li       | 2a               | 0        | 0        | 0        |
| Ni   | Ni       | 2d               | 0.5      | 0.5      | 0        |
| O    | O        | 4e               | 0.794792 | 0.491348 | 0.244974 |

  

| a        | b     | c        | $\alpha$ | $\beta$  | $\gamma$ |
|----------|-------|----------|----------|----------|----------|
| 5.023423 | 2.873 | 9.627304 | 90       | 29.20206 | 90       |

Table S3 - Crystallography information of rhombohedral LiNiO<sub>2</sub> employed in our calculations.

CoO, sphalerite structure

Space group  $\bar{1}42d$

| Site | Elements (spin direction) | Wyckoff position | x    | y    | z     |
|------|---------------------------|------------------|------|------|-------|
| Co1  | Co ( $\uparrow$ )         | 4b               | 0.5  | 0.5  | 1     |
| Co2  | Co ( $\downarrow$ )       | 4a               | 0    | 0    | 0     |
| O1   | O                         | 8d               | 0.25 | 0.25 | 0.125 |

| a        | b        | c        | $\alpha$ | $\beta$ | $\gamma$ |
|----------|----------|----------|----------|---------|----------|
| 4.307659 | 4.307659 | 9.040786 | 90       | 90      | 90       |

Table S4 - Crystallography information of CoO in sphalerite structure.

CoO, distorted rocksalt

Space group  $P2_1/m$

| Site | Elements (spin direction) | Wyckoff position | x        | y    | z        |
|------|---------------------------|------------------|----------|------|----------|
| Co1  | Co ( $\uparrow$ )         | 2e               | 0.511101 | 0.75 | 0.210507 |
| Co2  | Co ( $\downarrow$ )       | 2e               | 0.011104 | 0.75 | 0.710505 |
| O1   | O                         | 2e               | 0.228033 | 0.75 | 0.007943 |
| O2   | O                         | 2e               | 0.271972 | 0.25 | 0.492053 |

| a       | b        | c        | $\alpha$ | $\beta$  | $\gamma$ |
|---------|----------|----------|----------|----------|----------|
| 5.39076 | 2.977543 | 4.822464 | 90       | 74.10092 | 90       |

Table S5 - Crystallography information of CoO with a magnetic structure different from the experimental.

## Supercells used on phonon calculations

LiCoO<sub>2</sub>

Phonon calculation is performed on a 3x3x1 diagonal supercell of the following cell.

Space group 166 =  $R\bar{3}m$ , conventional cell.

|  | <b>Element</b> | <b>u</b> | <b>v</b> | <b>w</b>                   |                           |                            |
|--|----------------|----------|----------|----------------------------|---------------------------|----------------------------|
|  | Li             | 0        | 0        | 0                          |                           |                            |
|  | Co             | 0        | 0        | 0.5                        |                           |                            |
|  | O              | 0        | 0        | 0.23854                    |                           |                            |
|  | <b>a</b>       | <b>b</b> | <b>c</b> | <b><math>\alpha</math></b> | <b><math>\beta</math></b> | <b><math>\gamma</math></b> |
|  | 2.82662        | 2.82662  | 13.9127  | 90                         | 90                        | 120                        |

Table S6 - Crystallography information of LiCoO<sub>2</sub> supercell used for phonon calculations.

LiNiO<sub>2</sub>

Space group  $P2_1/c$

Phonon calculation is performed on a 2x4x2 diagonal supercell of the following cell.

Space group 14 =  $P2_1/c$

|    | <b>Element</b> | <b>u</b> | <b>v</b> | <b>w</b>                   |                           |                            |
|----|----------------|----------|----------|----------------------------|---------------------------|----------------------------|
| Li | 0              | 0.5      | 0        |                            |                           |                            |
| Ni | 0.5            | 0        | 0        |                            |                           |                            |
| O  | 0.71997        | 0.94427  | 0.25548  |                            |                           |                            |
|    | <b>a</b>       | <b>b</b> | <b>c</b> | <b><math>\alpha</math></b> | <b><math>\beta</math></b> | <b><math>\gamma</math></b> |
|    | 4.9076         | 2.9482   | 4.9087   | 90                         | 72.66                     | 90                         |

Table S7 - Crystallography information of LiNiO<sub>2</sub> supercell used for phonon calculations.

LiMnO<sub>2</sub>

Phonon calculation is performed using a 2x2x2 diagonal supercell of the following cell.

Space group *P2/c*

| Atom label | Elements (spin direction) | u        | v        | w        |          |  |
|------------|---------------------------|----------|----------|----------|----------|--|
| Li1        | Li                        | 0        | 0.1187   | 0.25     |          |  |
| Li2        | Li                        | 0.5      | 0.8814   | 0.25     |          |  |
| O1         | O                         | 0.25     | 0.6026   | 0        |          |  |
| O2         | O                         | 0.75     | 0.8577   | 0        |          |  |
| Mn1        | Mn (↑)                    | 0        | 0.6331   | 0.25     |          |  |
| Mn2        | Mn (↓)                    | 0.5      | 0.3668   | 0.25     |          |  |
| <b>a</b>   | <b>b</b>                  | <b>c</b> | <b>α</b> | <b>β</b> | <b>γ</b> |  |
| 5.3405     | 5.6848                    | 5.3417   | 90       | 117.54   | 90       |  |

*Table S8 - Crystallography information of LiMnO<sub>2</sub> supercell used for phonon calculations.*

## Vibrational contributions to thermodynamic potentials in the harmonic approximation (HA)

In the simplest case of a diatomic molecule which only has one mode of vibration  $a$ , the canonical partition function of the quantum oscillator in Maxwell-Boltzmann statistics is :

$$q_a = \sum_{j=0, \dots, \infty} \exp\left(-\frac{e_j}{k_B T}\right)$$

where index  $j$  numbers the quantum states,  $e_j$  is the energy associated with state  $j$ ,  $k_B$  is the Boltzmann constant and  $T$  the temperature. In the harmonic approximation, the energy associated with state  $j$  is

$$e_j = \left(j + \frac{1}{2}\right) h \nu_a$$

where  $\nu_a$  is the frequency of the mode and  $h$  is Planck's constant. Summing the geometric series leads to :

$$q_a = \frac{\exp\left(-\frac{\theta_a}{2T}\right)}{1 - \exp\left(-\frac{\theta_a}{T}\right)}$$

where we introduced the usual notation

$$\theta_a = \frac{h \nu_a}{k_B}$$

called the characteristic temperature of mode  $a$ .

In a molecule, there are not only one mode of vibration but  $M$  normal modes which, in the harmonic approximation, are independent. The probability for the oscillator to be in state  $(j_1 j_2 \dots j_M)$  is the product of the individual probabilities, as in:

$$\text{prob}(j_1 j_2 \dots j_M) = \text{prob}(j_1) \text{prob}(j_2) \dots \text{prob}(j_M)$$

Hence, the vibrational partition function of the molecule is the product of the individual partition functions of each mode:

$$Q_{vib} = \prod_{m=1}^M q_m$$

The vibrational contribution to the free energy  $F$  is obtained from the partition function  $Q$  according to the general formula of statistical physics:

$$F_{vib} = -k_B T \ln Q_{vib} \quad . \quad (1)$$

Thus, the vibrational free energy appears as a sum of the contributions of individual modes:

$$F_{vib} = \sum_{m=1}^M F_{vib m}$$

In turn, vibrational contributions to the internal energy  $U$ , entropy  $S$  and heat capacity at constant volume  $C_V$  may be obtained from  $F$  with the usual thermodynamical relationships<sup>1</sup>

$$S_{vib} = - \left( \frac{\partial F_{vib}}{\partial T} \right)_V, \quad U_{vib} = F_{vib} + TS_{vib}, \quad C_{V_{vib}} = - \left( \frac{\partial^2 U_{vib}}{\partial T^2} \right)_V \quad (2)$$

where the partial derivative at constant volume denotes the fact that the frequencies  $\nu_m$  are to be taken as constant. Clearly, all these quantities can be written as sums of contributions from individual modes.

In the case of an infinite perfect crystal containing  $N$  atoms per cell, the normal modes of vibration are obtained as plane waves which can be classified according to wavevectors, usually called k-points (or q-points), taken in the first Brillouin zone (1BZ). For each k-point there are  $3N$  normal modes.

As for the relevant thermodynamic quantities, they are now taken as the intensive ones, such as the energy per cell and the entropy per cell. The per-cell quantities can be obtained by a uniform sampling of the first Brillouin zone.

Numerical implementation forces to choose a finite and uniform sampling of the 1BZ. This sampling is defined by a list of k-points  $(\vec{k}_k, w_k)_{k=1, \dots, K}$  where  $K$  is the number of k-points,  $\vec{k}_k$  is the k-point vector of index  $k$  and  $w_k$  is its weight. In order to end up with extensive quantities corresponding for a quantity

of matter equal to one unit cell, the weights are normalized by  $\sum_{k=1}^K w_k = 1$ . The logarithm of the vibrational partition function for one unit cell is then given by :

$$\ln Q = \sum_{k=1}^K w_k \sum_{m=1}^{3N} \ln q_{k,m} .$$

$F, U, S$  and  $C_V$  are then obtained according to Eq (1) and Eq (2).

The CASTEP code used in this work takes as input data the crystallographic data, a sampling density of the 1BZ and the temperature  $T$ . It then automatically determines the k-point list, computes the normal modes of vibration and outputs the thermodynamic quantities  $F, U$  and  $S$ . The precision of the results strongly depends on the k-point sampling density, i.e. the larger  $K$ , the better the precision.

---

<sup>1</sup> They may also be written as analytical expressions involving sums over the normal modes of vibrations. The formulas can be found in any statistical thermodynamics textbook.

## Vibrational contributions to thermodynamic potentials in the quasi-harmonic approximation (QHA)

As described above, the HA leads to a formula for the free energy  $F(T)$  which involves the frequencies  $\nu_{k,m}$  of the vibrational normal modes for the selected k-point list  $\vec{k}_k, k = 1, \dots, K$  and index  $m = 1, \dots, 3N$ . This set of frequencies is obtained from a computation performed for an arbitrarily chosen unit cell volume  $V$ , for which it is customary to select the value at zero pressure.

In reality, all crystals are subject to thermal expansion, which means that if  $T$  is raised at a constant pressure  $P$ , the volume  $V$  changes. On the other hand one may easily observe, from 2 computations performed at different volumes, that the frequencies  $\nu_{k,m}$  are also volume-dependent. The QHA is a simple improvement of the HA that incorporates these facts into the model.

In the QHA, the internal energy of the crystal is written as

$$U(T,V) = U_{sta}(V) + U_{vib}(T,V)$$

where we introduce the label "sta" for static contributions, i.e. results of DFT geometry optimization tasks ending with a scalar stress tensor, including the energy itself, the unit cell volume, and the pressure<sup>2</sup>.  $U_{vib}(T,V)$  is the QHA vibrational contribution.

The QHA consists in introducing the dependency  $\nu_{k,m}(V)$  into the vibrational partition function obtained using the HA (described in the previous Section). The necessary input data is obtained by repeating at several values of  $V$  the DFT computations of the normal modes of vibrations, as in the HA. This formally yields the QHA for the free energy as

$$F(T,V) = U_{sta}(V) + F_{vib}(T,V) \quad .$$

The internal energy  $U$  and entropy  $S$  are then obtained using relationships (2) as before.

Since the state variables are now  $T$  and  $V$ , the pressure  $P$  is given by the thermodynamic relationship

$$P = - \left( \frac{\partial F}{\partial V} \right)_T \quad . \quad (3)$$

In general however, one is interested by the thermodynamic properties at given  $P$ , for example ambient pressure, rather than at a given  $V$ . Thus we must solve Eq (3) for  $V$  at the selected target temperature  $T_t$  and target pressure  $P_t$ . This is a simple numerical analysis problem for which a great variety of methods and numerical implementations may be used. We use the following procedure.

We arbitrarily choose a set of 3 pressures  $P_i, i = 1,2,3$  between say 0 and  $-15 \text{ GPa}$ . CASTEP geometry optimization jobs at these (static) pressures yield the three corresponding volumes  $V_i, i = 1,2,3$  and sets of phonon frequencies  $\nu_{k,m,i}, i = 1,2,3$ . Then for the target temperature  $T_t$ , the HA yields 3 numbers  $F_i(T_t) = F(T_t, V_i)$  which we fit to a quadratic polynomial in the variable  $V$  in order to get an analytical

---

<sup>2</sup> The static results are often reported in the literature as an equation of state (EOS)  $P_{sta}(V)$  or the corresponding integrated EOS  $U_{sta}(V)$ , which are related by  $P_{sta} = -dU_{sta}/dV$ . When there is no explicit mention of the fact that these are static data, one should keep in mind that they differ from the actual thermodynamic properties at  $T = 0K$  by the so-called "zero-point vibrational contributions" which are one of

the outputs of the QHA and result from the  $\frac{1}{2}h\nu_a$  contribution to the energy  $e_j$  of the quantum oscillator.



formula for  $F(T, V)$  as a function of  $V$  for this specific temperature  $T_t$ . Eq (3) can then be solved analytically for  $V$  at the target pressure  $P_t$ . This gives a first estimate of the solution  $V(T_t, P_t)$ .

In order to make this result more reliable however, we generally iterate this procedure with different sets of pressures  $P_i$  until the estimated  $V(T_t, P_t)$  lies within the volume interval containing the three  $V_i$  on which the fit is performed, while simultaneously ensuring that the polynomial fit is robust and meets a satisfactory precision.

With the volume at a given pressure and temperature, we can calculate the coefficient of thermal expansion given by

$$\alpha = \frac{1}{V} \left( \frac{\partial V}{\partial T} \right)_P$$

And finally, the heat capacity at constant pressure is written as

$$C_p = C_v + TVB\alpha^2$$

Where  $C_v$  is the heat capacity at constant volume and  $B$  is the bulk modulus, given by

$$B = V \left( \frac{\partial P}{\partial V} \right)_T$$
